# Supplementary material
Source: Springer Nature journal article supplement (http://www.springermedizin.de/resource/supplementary/12933_2007_93_MOESM1_ESM.pdf/9539570)

**Control****Diabetic****a**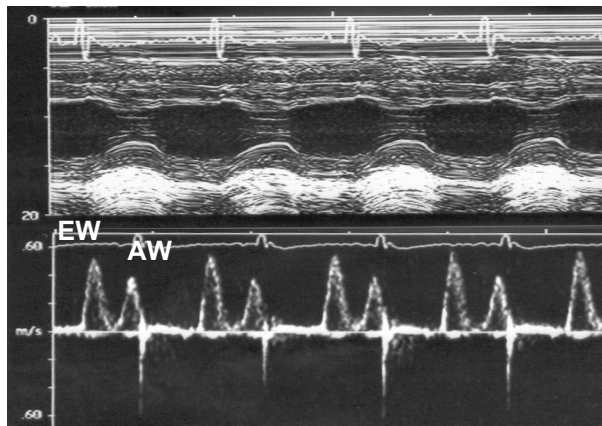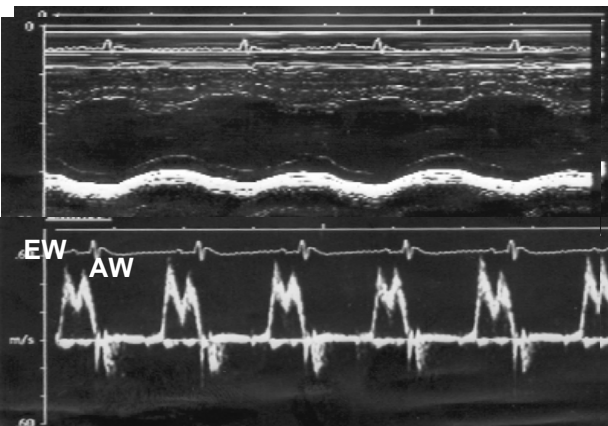**b**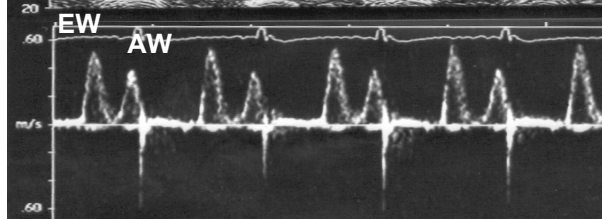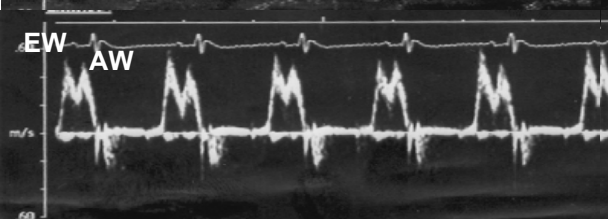**c**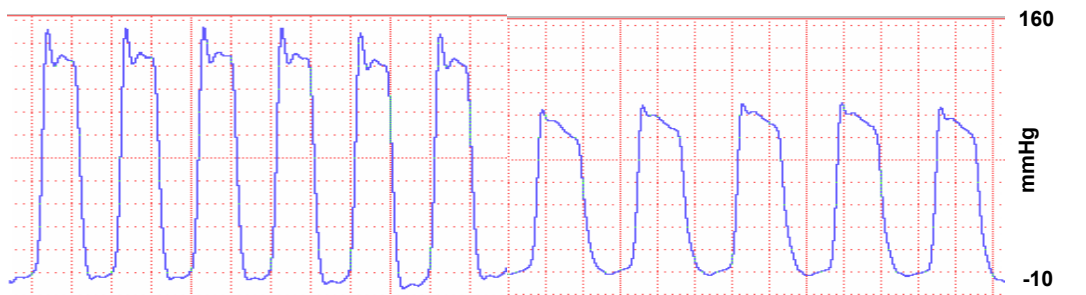**d**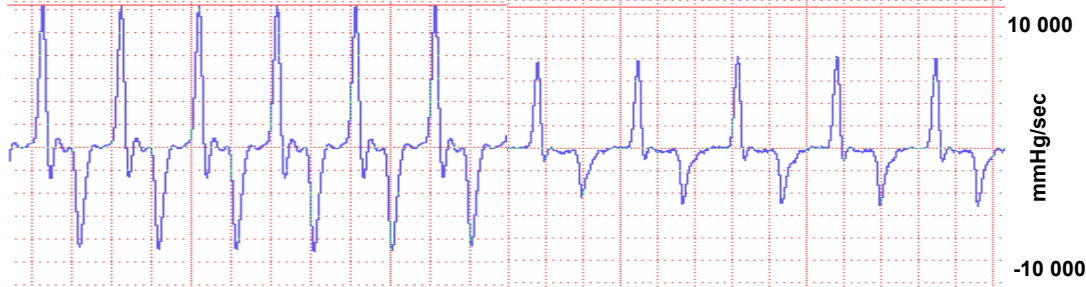

Supplement: MOESM1 [file 9539570]
